# Supplementary material for: The dual-functional role of carboxylate in a nickel–iron catalyst towards efficient oxygen evolution
Source: Royal Society of Chemistry journal article supplement (doi:10.1039/d4nr03689a), 2024-01-01
Supplement: d4nr03689a1.pdf [file d4nr03689a1.pdf]

Supplementary Information for

**The dual-functional role of carboxylate in a nickel-iron catalyst towards efficient oxygen evolution**

Dan Wu, Yuanhua Sun, Xue Zhang, Xiaokang Liu, Linlin Cao\* and Tao Yao

National Synchrotron Radiation Laboratory, School of Nuclear Science and Technology, University of Science and Technology of China, Hefei 230029, P.R. China.

E-mail: caolin@ustc.edu.cn

## Supplementary Figures

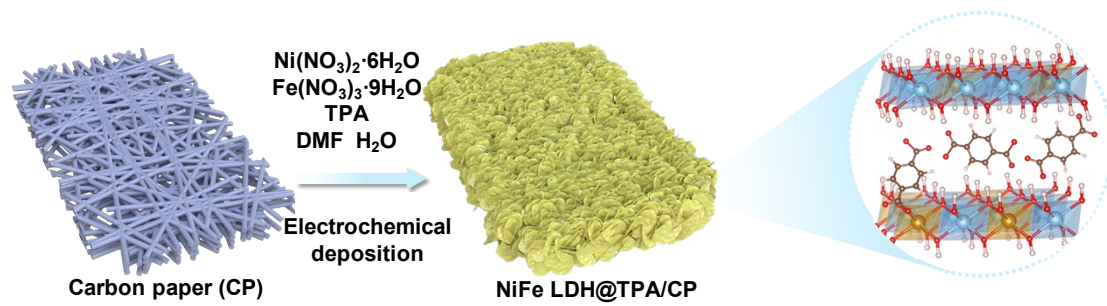

**Fig. S1** The schematic diagram of the synthesis process for NiFe LDH@TPA electrode.

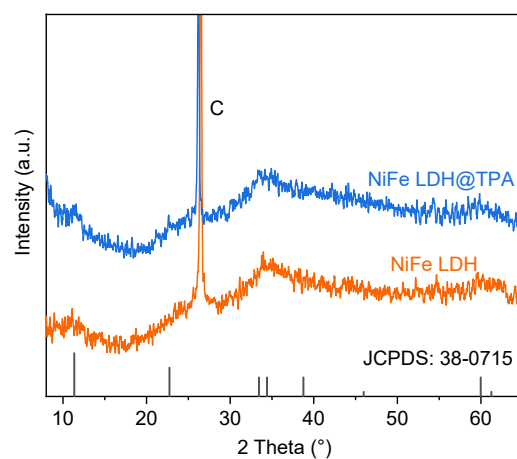

**Fig. S2** XRD patterns of NiFe LDH and NiFe LDH@TPA. The sharp diffraction peak at about  $26^\circ$  is originated from the carbon in the carbon paper.

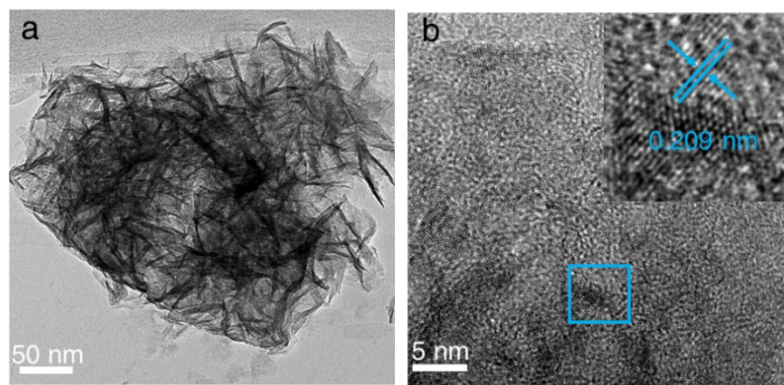

**Fig. S3** (a) TEM and (b) HRTEM images of NiFe LDH.

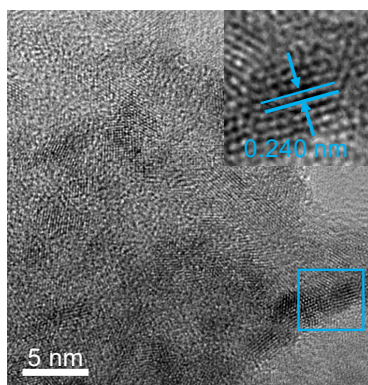

**Fig. S4** HRTEM images of NiFe LDH@TPA.

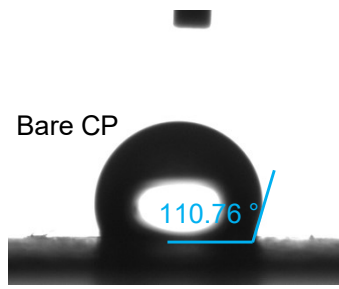

**Fig. S5** The contact angles of bare CP.

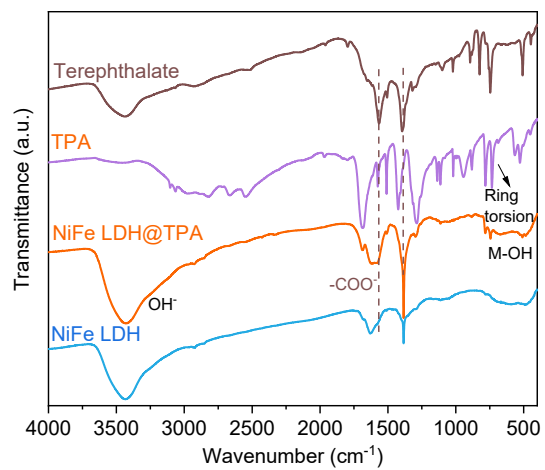

**Fig. S6** FTIR spectra of NiFe LDH, NiFe LDH@TPA, and reference samples in the range of 400-4000 cm<sup>-1</sup>.

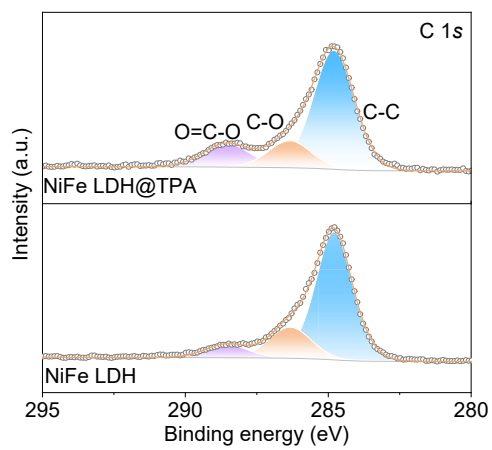

**Fig. S7** C 1s high-resolution XPS spectra of NiFe LDH@TPA and NiFe LDH.



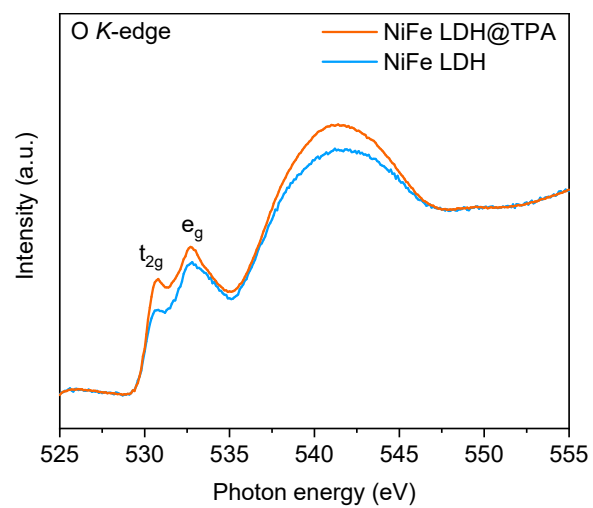

**Fig. S8** O *K*-edge sXAS spectra of NiFe LDH@TPA and NiFe LDH.

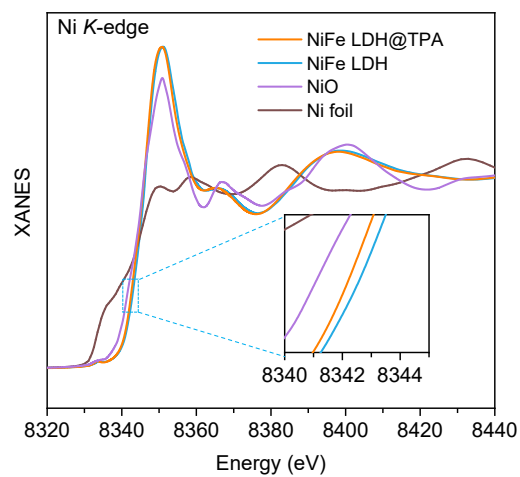

**Fig. S9** Ni *K*-edge XANES spectra of NiFe LDH@TPA, NiFe LDH, and referenced samples.

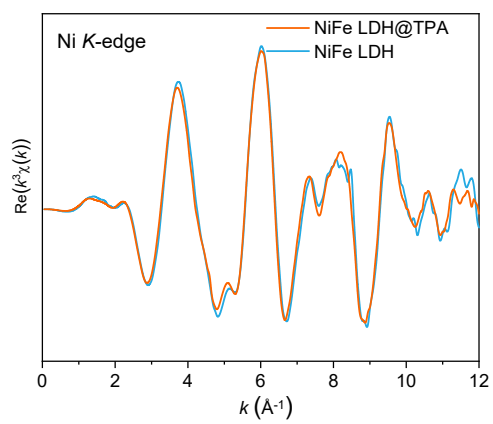

**Fig. S10**  $k^3\chi(k)$  oscillations spectra of Ni *K*-edge of NiFe LDH@TPA, NiFe LDH.

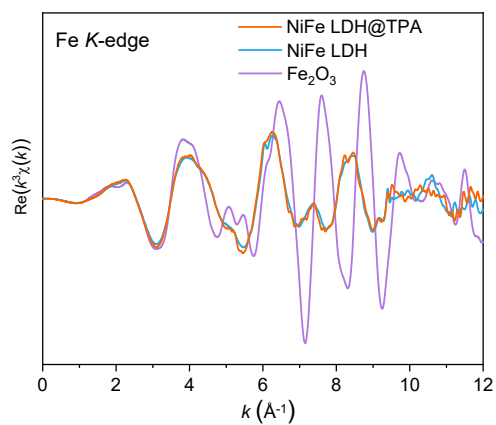

**Fig. S11**  $k^3\chi(k)$  oscillations spectra of Fe *K*-edge of NiFe LDH@TPA, NiFe LDH and referenced sample.

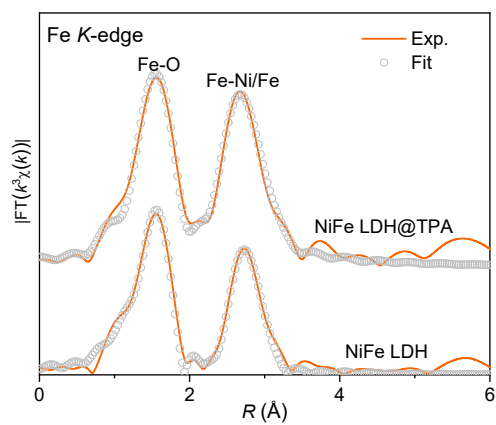

**Fig. S12** Fe *K*-edge FT-EXAFS curves and corresponding fitting of NiFe LDH@TPA and NiFe LDH.

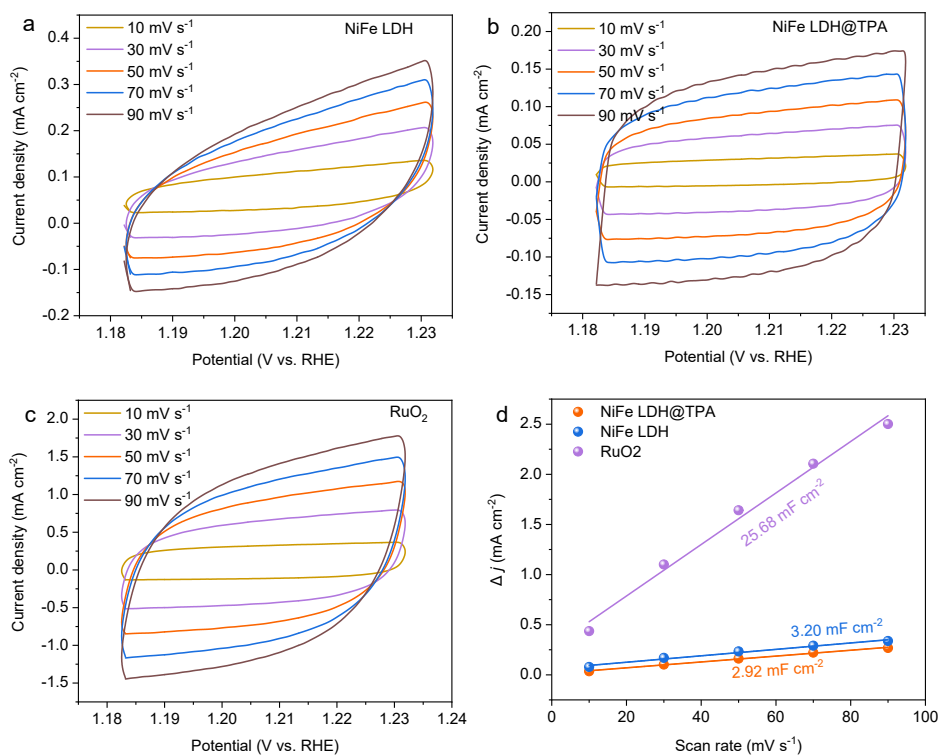

**Fig. S13** Cyclic voltammograms (CVs) recorded within a non-faradaic region at different scan rates for (a). NiFe LDH, (b) NiFe LDH@TPA, and (c) RuO<sub>2</sub>. (d) Double-layer capacitances ( $C_{dl}$ ).

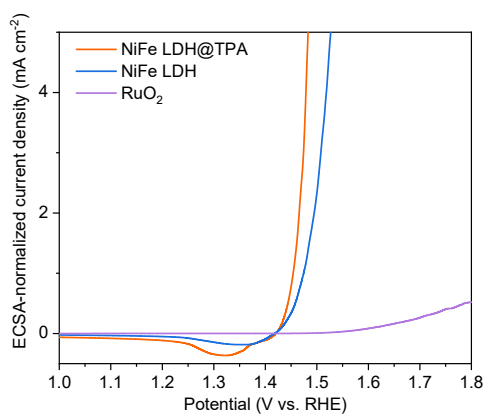

**Fig. S14** The ECSA-normalized LSVs of the electrocatalysts.

The ECSA of electrocatalyst was estimated from the obtained double-layer capacitances ( $C_{dl}$ ) according to the formula:

$$ECSA = C_{dl}/C_s \quad (\text{Eq. S1})$$

The  $C_{dl}$  value was calculated from related cyclic voltammograms (CVs), which were recorded within a non-faradaic region at different scan rates. The term  $C_s$  stands for the specific capacitance of a smooth surface per unit area under certain circumstances. In this work, a  $C_s$  value of  $0.04 \text{ mF cm}^{-2}$  was used.

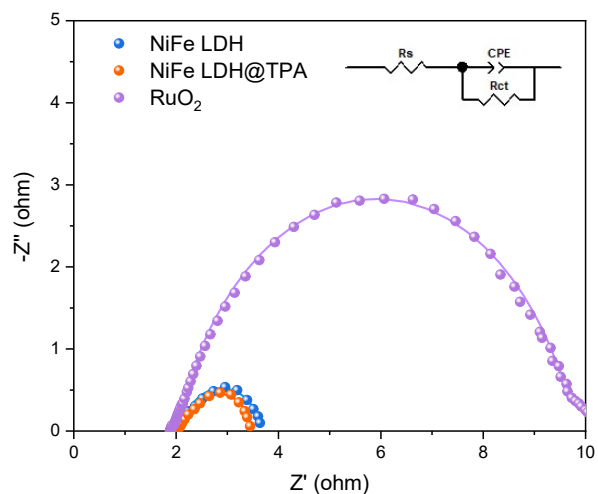

**Fig. S15** Nyquist plots for the prepared catalysts and the Equivalent circuit for the fitting of the EIS responses. The solid lines represent corresponding fitting curves.  $R_s$ ,  $R_{ct}$ , and CPE represent the series resistance, charge-transfer resistance, and constant phase elements, respectively.



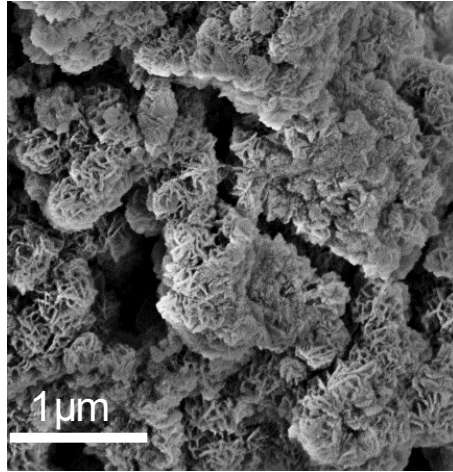

**Fig. S16** SEM image of NiFe LDH@TPA after durability test.

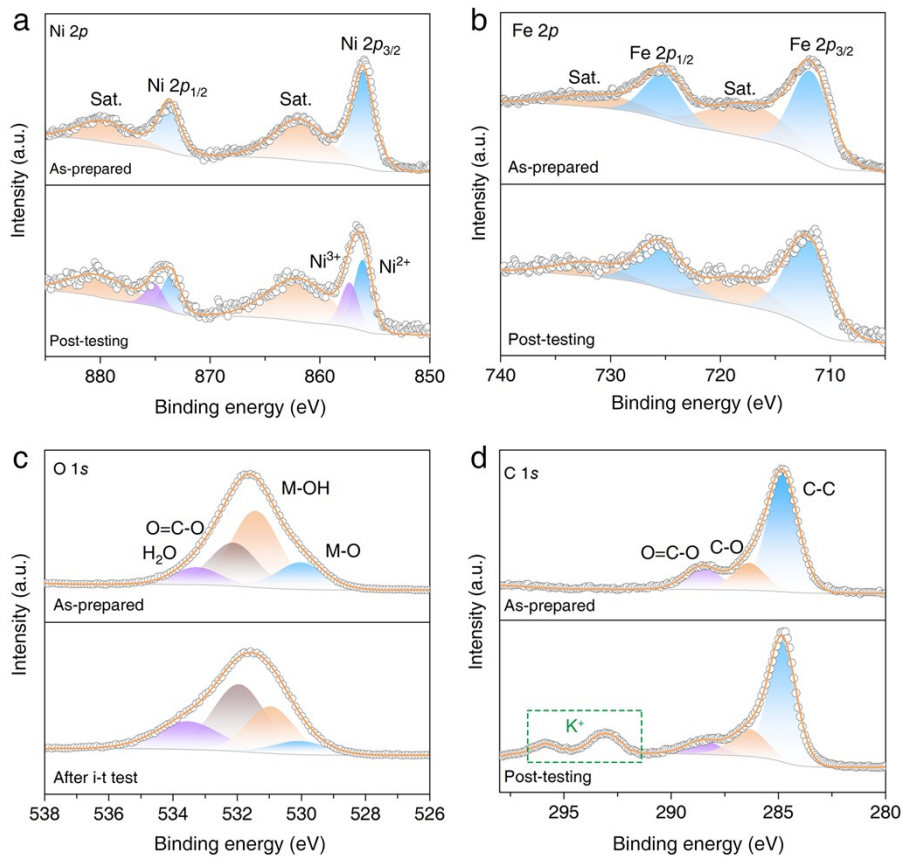

**Fig. S17** (a) Ni 2p, (b) Fe 2p, (c) O 1s, and (d) C 1s XPS spectra of as-prepared and post-testing NiFe LDH@TPA. The XPS peaks located at around 293 and 296 eV are attributed to the K<sup>+</sup> from the electrolyte.

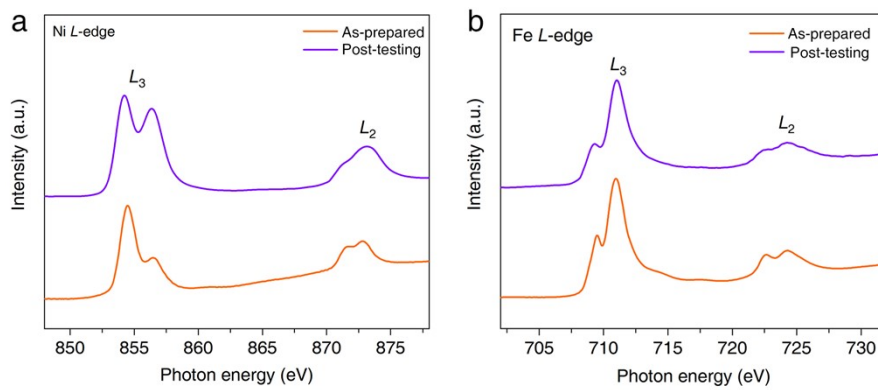

**Fig. S18** sXAS spectra of as-prepared and post-testing NiFe LDH@TPA recorded at (a) Ni and (b) Fe  $L$ -edge.

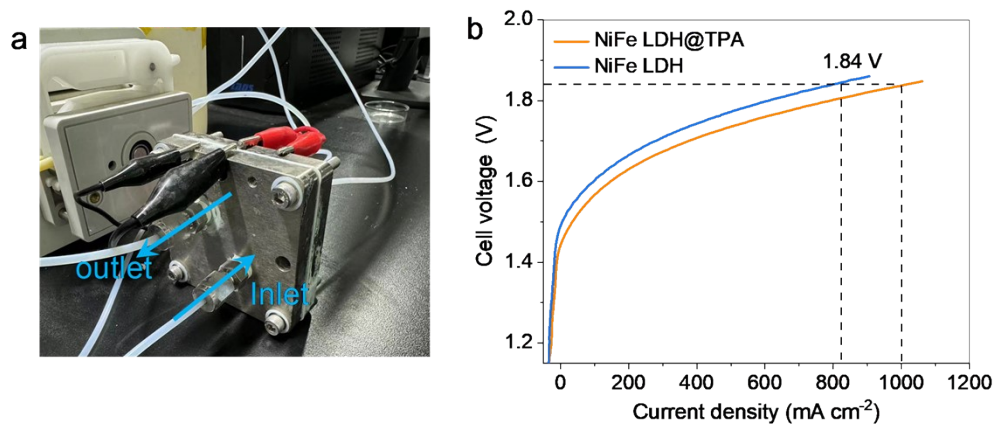

**Fig. S19** (a) The photograph of AEMWE for the test. (b) Polarization curves in the AEMWE operated at 60 °C and 1 M KOH.

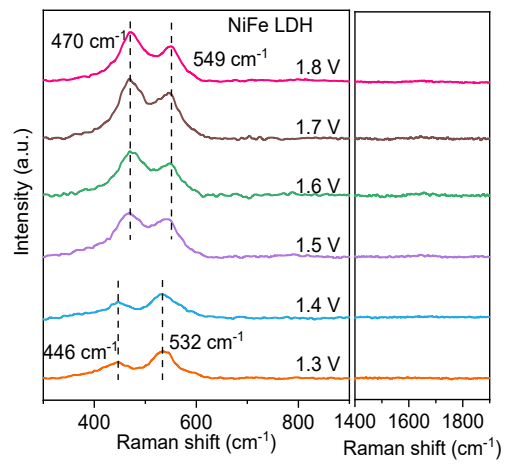

**Fig. S20** *In situ* Raman spectra of NiFe LDH.

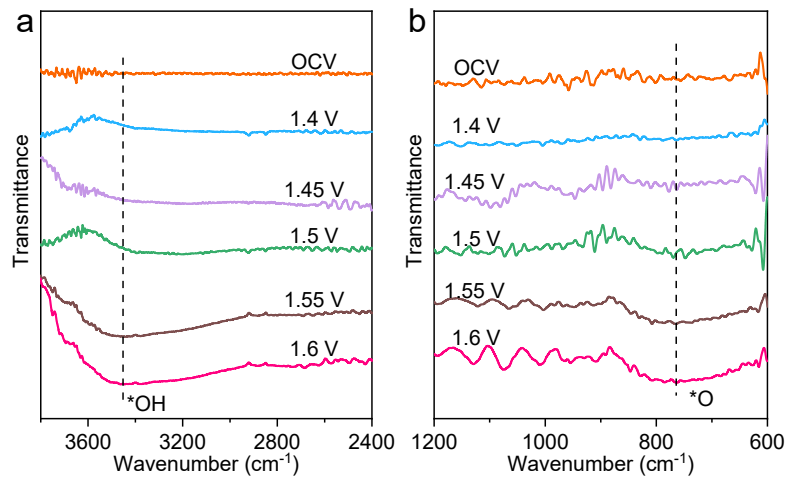

**Fig. S21** *In situ* SRIR spectra of NiFe LDH.

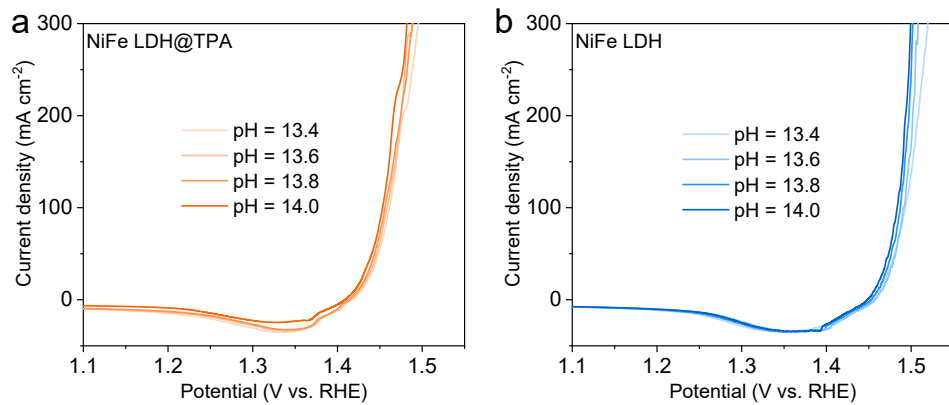

**Fig. S22** pH-dependent LSV curves of (a) NiFe LDH@TPA and (b) NiFe LDH.

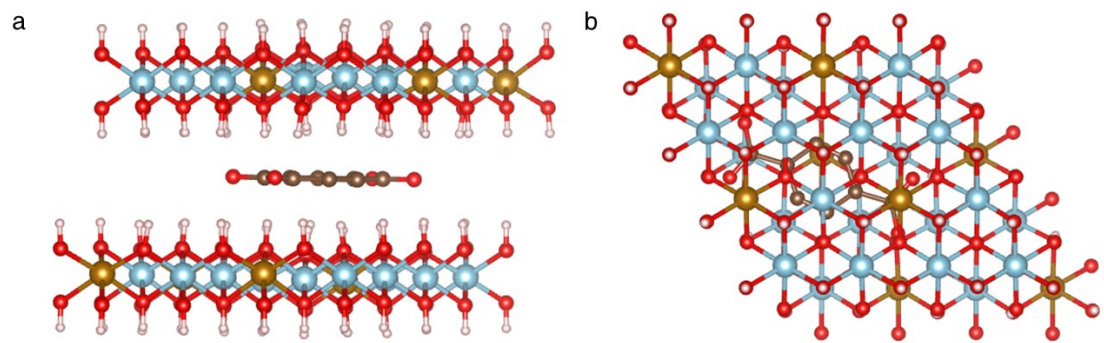

**Fig. S23** The optimized configurations of NiFe LDH@TPA for DFT calculation.



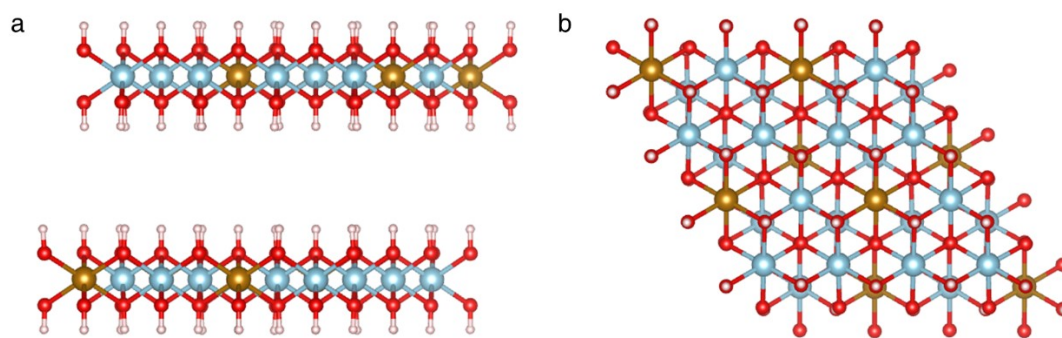

**Fig. S24** The optimized configurations of NiFe LDH for DFT calculation.

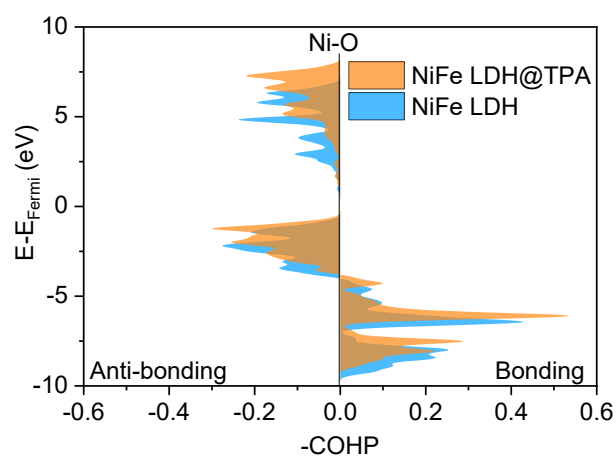

**Fig. S25** -COHP of Ni-O bond in NiFe LDH@TPA and NiFe LDH. The  $-ICOHP$  values of Ni-O bond in NiFe LDH@TPA and NiFe LDH are 0.48 and 0.43, respectively.

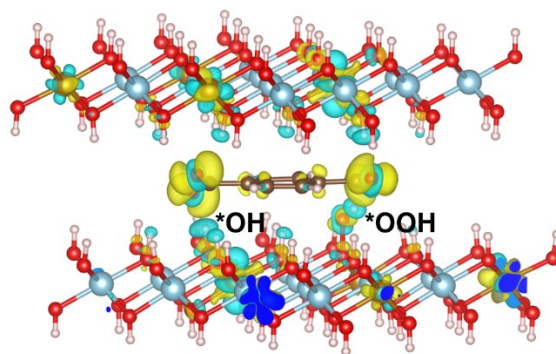

**Fig. S26** Charge density difference analysis between  $*OH$  and  $*OOH$  intermediates and TPA in NiFe LDH@TPA.

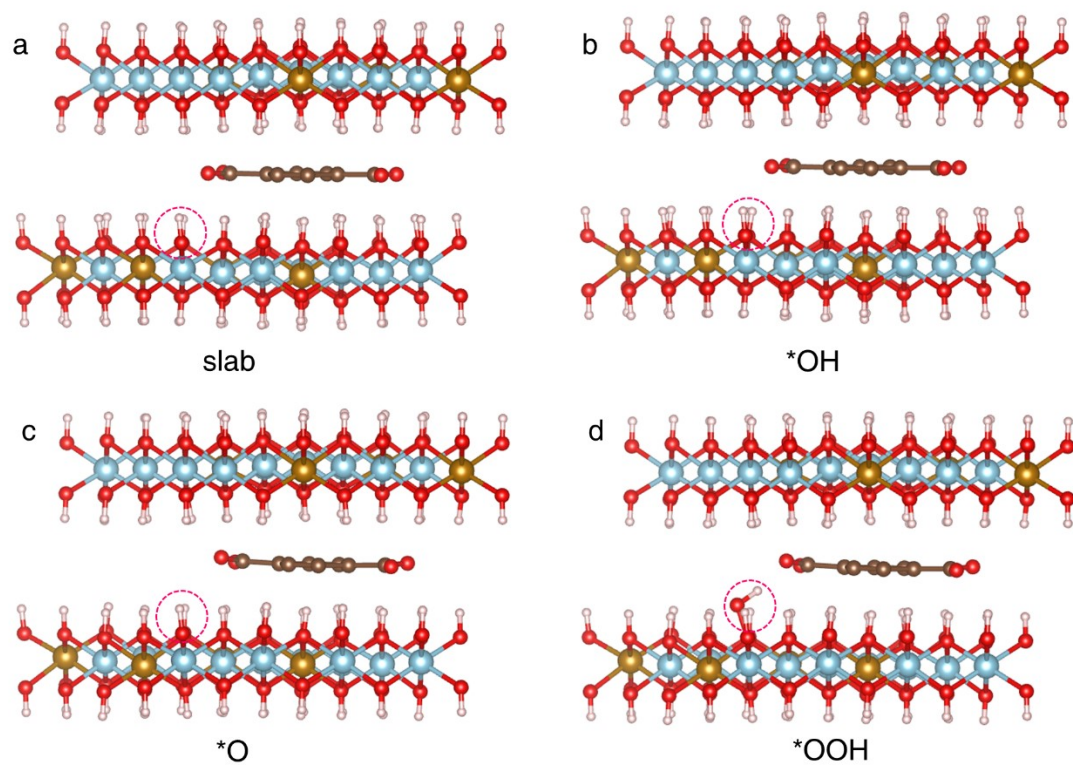

**Fig. S27** The optimized configurations of \*OH, \*O, and \*OOH adsorbed on NiFe LDH@TPA.

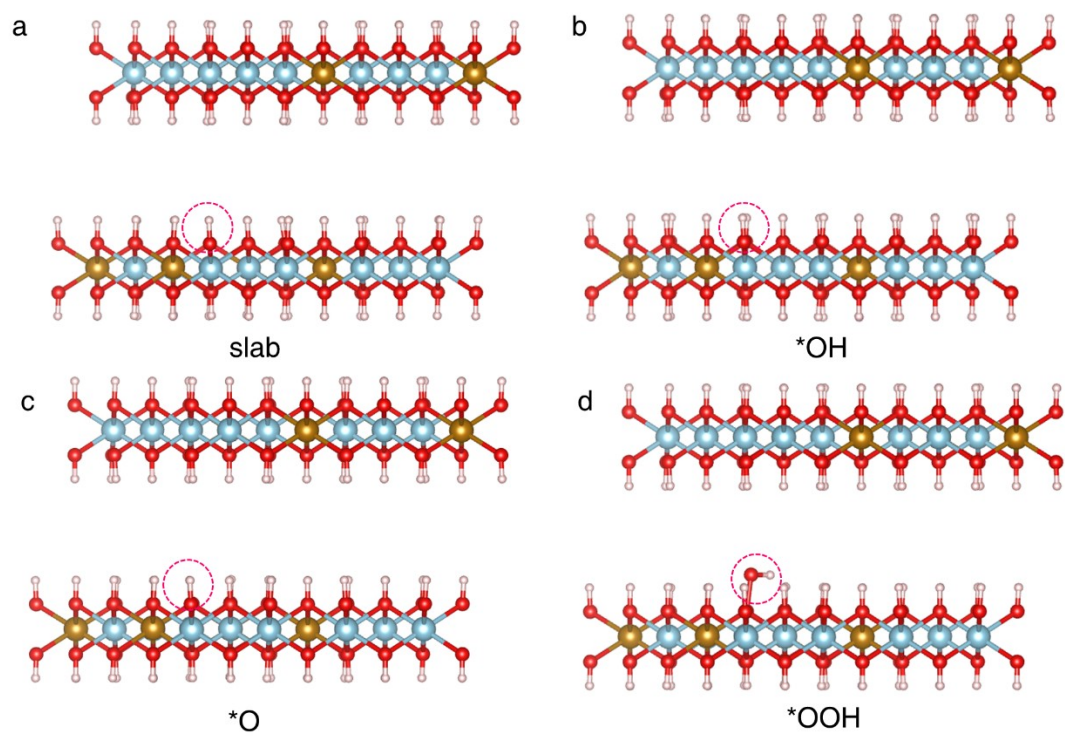

**Fig. S28** The optimized configurations of \*OH, \*O, and \*OOH adsorbed on NiFe LDH.

**Table S1** Structural parameters extracted from the Ni and Fe *K*-edge EXAFS fitting.

| Ni <i>K</i> -edge |          |      |       |                               |                   |          |
|-------------------|----------|------|-------|-------------------------------|-------------------|----------|
| Sample            | Path     | CN   | R(Å)  | $\sigma^2(10^{-3}\text{Å}^2)$ | $\Delta E_0$ (eV) | R-factor |
| NiFe LDH@TPA      | Ni-O     | 6.02 | 2.048 | 6.55                          | -2.85             | 0.009    |
|                   | Ni-Ni/Fe | 5.50 | 3.098 | 10.57                         | 1.56              |          |
| NiFe LDH          | Ni-O     | 6.04 | 2.049 | 6.05                          | -1.50             | 0.007    |
|                   | Ni-Ni/Fe | 5.09 | 3.099 | 10.02                         | 2.12              |          |
| Fe <i>K</i> -edge |          |      |       |                               |                   |          |
| Sample            | Path     | CN   | R(Å)  | $\sigma^2(10^{-3}\text{Å}^2)$ | $\Delta E_0$ (eV) | R-factor |
| NiFe LDH@TPA      | Fe-O     | 5.41 | 1.998 | 6.30                          | -4.76             | 0.006    |
|                   | Fe-Ni/Fe | 5.31 | 3.110 | 8.58                          | -3.14             |          |
| NiFe LDH          | Fe-O     | 5.32 | 2.001 | 5.76                          | -4.82             | 0.007    |
|                   | Fe-Ni/Fe | 5.38 | 3.111 | 9.43                          | -3.94             |          |

$S_0^2$  is the amplitude reduction factor (0.78 for Ni; 0.85 for Fe); *CN* is the coordination number; *R* is interatomic distance (the bond length between central atoms and surrounding coordination atoms);  $\sigma^2$  is Debye-Waller factor (a measure of thermal and static disorder in absorber-scatterer distances);  $\Delta E_0$  is edge-energy shift (the difference between the zero kinetic energy value of the sample and that of the theoretical model). *R* factor is used to value the goodness of the fitting.

**Table S2** The parameters for the fitting of the EIS.

| <b>Catalysts</b> | <b><math>R_s(\Omega)</math></b> | <b><math>R_{ct}(\Omega)</math></b> |
|------------------|---------------------------------|------------------------------------|
| NiFe LDH@TPA     | 1.973                           | 1.697                              |
| NiFe LDH         | 1.997                           | 1.849                              |
| RuO <sub>2</sub> | 1.95                            | 7.904                              |

**Table S3** Comparison of the overpotentials at 10 mA cm<sup>-2</sup> and Tafel slopes among different electrocatalysts under alkaline OER.

| Catalysts                                          | $\eta@10 \text{ mA cm}^{-2}$<br>(mV) | Tafel slope<br>(mV dec <sup>-1</sup> ) | Reference |
|----------------------------------------------------|--------------------------------------|----------------------------------------|-----------|
| NiFe LDH@TPA                                       | 200                                  | 29.2                                   | This work |
| Au <sub>SA</sub> -MnFeCoNiCu LDH                   | 213                                  | 27.5                                   | Ref [1]   |
| Co-Fe catalyst                                     | 319                                  | 28.3                                   | Ref [2]   |
| $\gamma$ -FeOOH/Ni-MOFNA                           | 193                                  | 36                                     | Ref [3]   |
| NiFe-ANR                                           | 228                                  | 37                                     | Ref [4]   |
| Ir <sub>1</sub> /V <sub>O</sub> .CoOOH             | 200                                  | 32                                     | Ref [5]   |
| Fe-NiO/NiS <sub>2</sub>                            | 270                                  | 40                                     | Ref [6]   |
| MIL-53(Fe)-2OH                                     | 215                                  | 45.4                                   | Ref [7]   |
| Mo <sub>1</sub> -NiFeO <sub>x</sub> H <sub>y</sub> | 193                                  | 32.33                                  | Ref [8]   |
| Ir <sub>1</sub> /CoOOH <sub>sur</sub>              | 210                                  | 33                                     | Ref [9]   |
| Ir <sub>1</sub> -Ni(OH) <sub>2</sub>               | 260                                  | 78                                     | Ref [10]  |
| S-FeOOH/IF                                         | 244                                  | 59                                     | Ref [11]  |
| NiFe LDH-PMo12                                     | 206                                  | 47.5                                   | Ref [12]  |
| NiOOH/(LDH/ $\alpha$ -FeOOH)                       | 195                                  | 35                                     | Ref [13]  |
| Ru <sub>1</sub> /D-NiFe LDH                        | 189                                  | 31                                     | Ref [14]  |
| F-NiFe-A                                           | 218                                  | 32                                     | Ref [15]  |
| S/N-CMF@FexCoyNi <sub>1-x-y</sub> -<br>MOF         | 296                                  | 53.5                                   | Ref [16]  |
| Ir/CoFe-LDH/rGO,                                   | 195                                  | 48.6                                   | Ref [17]  |
| hBN-NiFeO <sub>x</sub> H <sub>y</sub>              | 230                                  | 30                                     | Ref [18]  |
| FeCoPBA-V <sub>CN</sub>                            | 218                                  | 39                                     | Ref [19]  |
| NiFe-S-TCNQ                                        | 209                                  | 36.1                                   | Ref [20]  |



## Reference

1. F. Wang, P. Zou, Y. Zhang, W. Pan, Y. Li, L. Liang, C. Chen and H. Liu, S. Zheng, *Nat. Commun.*, 2023, **14**, 6019.
2. T. H. M. Pham, T.-H. Shen, Y. Ko, L. Zhong, L. Lombardo, W. Luo, S. Horike, V. Tileli and A. Züttel, *J. Am. Chem. Soc.*, 2023, **145**, 23691.
3. C. Ni, H. Zheng, W. Liu, L. Wu, R. Li, K. Zhou and W. Zhang, *Adv. Funct. Mater.*, 2023, **33**, 2301075.
4. X. Li, H. Zhang, Q. Hu, W. Zhou, J. Shao, X. Jiang, C. Feng, H. Yang and C. He, *Angew. Chem. Int. Ed.*, 2023, **62**, 202300478.
5. Z. Zhang, C. Feng, D. Wang, S. Zhou, R. Wang, S. Hu, H. Li, M. Zuo, Y. Kong, J. Bao and J. Zeng, *Nat. Commun.*, 2022, **13**, 2473.
6. N. Zhang, Y. Hu, L. An, Q. Li, J. Yin, J. Li, R. Yang, M. Lu, S. Zhang, P. Xi and C. H. Yan, *Angew. Chem. Int. Ed.*, 2022, **61**, 202207217.
7. C. Zhang, Q. Qi, Y. Mei, J. Hu, M. Sun, Y. Zhang, B. Huang, L. Zhang and S. Yang, *Adv. Mater.*, 2022, **35**, 2208904.
8. Y. Wu, Y. Zhao, P. Zhai, C. Wang, J. Gao, L. Sun and J. Hou, *Adv. Mater.*, 2022, **32**, 2202523.
9. C. Feng, Z. Zhang, D. Wang, Y. Kong, J. Wei, R. Wang, P. Ma, H. Li, Z. Geng, M. Zuo, J. Bao, S. Zhou and J. Zeng, *J. Am. Chem. Soc.*, 2022, **144**, 9271.
10. Q. He, S. Qiao, Q. Zhou, Y. Zhou, H. Shou, P. Zhang, W. Xu, D. Liu, S. Chen, X. Wu and L. Song, *Nano Lett.*, 2022, **22**, 3832.
11. X. Chen, Q. Wang, Y. Cheng, H. Xing, J. Li, X. Zhu, L. Ma, Y. Li and D. Liu, *Adv. Funct. Mater.*, 2022, **32**, 2112674.
12. Z. Cai, P. Wang, J. Zhang, A. Chen, J. Zhang, Y. Yan and X. Wang, *Adv. Mater.*, 2022, **34**, 2110696.
13. M. Cai, Q. Zhu, X. Wang, Z. Shao, L. Yao, H. Zeng, X. Wu, J. Chen, K. Huang and S. Feng, *Adv. Mater.*, 2022, **35**, 2209338.
14. P. Zhai, M. Xia, Y. Wu, G. Zhang, J. Gao, B. Zhang, S. Cao, Y. Zhang, Z. Li, Z. Fan, C. Wang, X. Zhang, J. T. Miller, L. Sun and J. Hou, *Nat. Commun.*, 2021, **12**, 4587.
15. Q. Xu, H. Jiang, X. Duan, Z. Jiang, Y. Hu, S. W. Boettcher, W. Zhang, S. Guo and C. Li, *Nano Lett.*, 2021, **21**, 492.
16. Y. Zhao, X. F. Lu, Z. P. Wu, Z. Pei, D. Luan and X. W. D. Lou, *Adv. Mater.*, 2023, **35**, 2207888.
17. W. Xu, J. Cao, T. Mou, B. Mei, P. Yao, C. Han, X. Gong, P. Song, Z. Jiang, T. Frauenheim and J. Xiao, *Angew. Chem. Int. Ed.*, 2023, **62**, 202310973.
18. Y. Lu, B. Li, N. Xu, Z. Zhou, Y. Xiao, Y. Jiang, T. Li, S. Hu, Y. Gong and Y. Cao, *Nat. Commun.*, 2023, **14**, 6965.
19. Y. Lin, H. Ren, S. Zhang, S. Liu, T. Zhao, W. J. Jiang, W. Zhou, J. S. Hu and Z. Li, *Adv. Energy Mater.*, 2023, **14**, 2302403.
20. Y. Lin, J. Fang, W. Wang, Q. Wen, D. Huang, D. Ding, Z. Li, Y. Liu, Y. Shen and T. Zhai, *Adv. Energy Mater.*, 2023, **13**, 2300604.
